# Supplementary material for: Multiple Virus Infections in Western Honeybee (Apis mellifera L.) Ejaculate Used for Instrumental Insemination
Source: MDPI journal article supplement (doi:10.3390/v11040306), 2019-03-29
Supplement: s1 [file s1]

**Table S2:** Accession numbers of BQCV and SBV strains used in phylogenetic analyses.

| <b>Strain</b>      | <b>Virus</b> | <b>Country of origin</b> | <b>GenBank accession No.</b> |
|--------------------|--------------|--------------------------|------------------------------|
| Dol826             | BQCV         | Czech Republic           | MG584538                     |
| Dol35              | BQCV         | Czech Republic           | MH992095                     |
| Dol45              | BQCV         | Czech Republic           | MH992096                     |
| Dol47              | BQCV         | Czech Republic           | MH992097                     |
| PP                 | BQCV         | Czech Republic           | KY243932                     |
| R4LY 62            | BQCV         | Great Britain            | GU903466                     |
| R4LY 65            | BQCV         | Great Britain            | GU903467                     |
| Rothamsted         | BQCV         | Great Britain            | AF125252                     |
| Hungary-10         | BQCV         | Hungary                  | EF517515                     |
| GS1                | BQCV         | China                    | KY741959                     |
| JL1                | BQCV         | China                    | KP119603                     |
| KM-1               | BQCV         | China                    | MG799370                     |
| BQCV_2             | BQCV         | Russia                   | KC138853                     |
| 15A                | BQCV         | Turkey                   | FJ588532                     |
| POLAND-4           | BQCV         | Poland                   | EF517519                     |
| QLD                | BQCV         | Australia                | KY465686                     |
| SA                 | BQCV         | Australia                | KY465685                     |
| Sydney             | BQCV         | Australia                | MF623171                     |
| South African      | BQCV         | South Africa             | AF183905                     |
| AY                 | BQCV         | South Korea              | JX149531                     |
| Dol51              | SBV          | Czech Republic           | MK550481                     |
| Serbia S1          | SBV          | Serbia                   | KM001901                     |
| 155/1030/1253      | SBV          | Austria                  | KC513758                     |
| 1003               | SBV          | Austria                  | KC513760                     |
| 1006               | SBV          | Austria                  | KC513759                     |
| 20100203/24        | SBV          | France                   | KC513754                     |
| D12-2024/S 1861    | SBV          | France                   | KC513753                     |
| AFSSA P12          | SBV          | France                   | AY230517                     |
| Germany 2          | SBV          | Germany                  | AF284619                     |
| Germany 8          | SBV          | Germany                  | AF284625                     |
| CSBV-LN/China/2009 | SBV          | China                    | HM237361                     |
| CSBV-JL/China/2014 | SBV          | China                    | KU574661                     |
| TN-1               | SBV          | India                    | KX663835                     |
| II-9               | SBV          | India                    | JX270797                     |
| BG                 | SBV          | Vietnam                  | KX668141                     |
| AmSBV-Viet4        | SBV          | Vietnam                  | KM884993                     |
