# Supplementary material for: Multiple Virus Infections in Western Honeybee (Apis mellifera L.) Ejaculate Used for Instrumental Insemination
Source: MDPI journal article supplement (doi:10.3390/v11040306), 2019-03-29
Supplement: s1 [file s1]

Table S4: The distribution of honey bee viruses in single or mixed infections in drone semen samples.

| Detected viral pathogens        | Number of positive samples (%) |
|---------------------------------|--------------------------------|
| DWV                             | 10 (25.6)                      |
| <i>AmFV</i>                     | 3 (7.7)                        |
| DWV + <i>AmFV</i>               | 13 (33.3)                      |
| DWV + ABPV + <i>AmFV</i>        | 6 (15.4)                       |
| DWV + BQCV + <i>AmFV</i>        | 5 (12.8)                       |
| DWV + ABPV + BQCV + <i>AmFV</i> | 1 (2.6)                        |
| DWV + ABPV + SBV + <i>AmFV</i>  | 1 (2.6)                        |
| Total positive samples          | 39 (90.7)                      |
