# Supplementary material for: Multiple Virus Infections in Western Honeybee (Apis mellifera L.) Ejaculate Used for Instrumental Insemination
Source: MDPI journal article supplement (doi:10.3390/v11040306), 2019-03-29
Supplement: s1 [file s1]

Table S1: List of PCR primers used in the study.

| Primer designation                         | 5' – 3' sequence                                     | Reference | Amplicon size (bp) |
|--------------------------------------------|------------------------------------------------------|-----------|--------------------|
| DWV-1 20f<br>DWV-1 157r                    | CGAATTACGGTGCAACTAAC<br>ACAATAGATGGTCGGTGACA         | [a]       | 559 bp             |
| DWV-4 2345f<br>DWV-4 2779r                 | ATTGTGCCAGATTGGACTAC<br>AGATGCAATGGAGGATACAG         | [a]       | 435 bp             |
| DWV-10 8934f<br>DWV-10 9599r               | CCTATCGAGCTGCACGACTT<br>CCGAGACCTTGTCAGGTTA          | [a]       | 666 bp             |
| Pan-DWV-F<br>Pan-DWV-R                     | ACGCAACCCAGGAAT<br>GTAGCTAATTTACCCAATCTTTAAA         | [b]       | 179 bp             |
| ABPV-1 5381 f<br>ABPV-1 5517 r             | AATGGGCCTATGGACTTTTCTA<br>AAATCTCCTGCAATAACCTTGG     | [c]       | 178 bp             |
| ABPV 1F<br>ABPV 2R                         | AGCCACTATGTGCTATCGTAT<br>ATGGTGACCTCTGTGTCATTA       | [d]       | 207 bp             |
| BQCV 2144+<br>BQCV 2726-                   | TGAGAGCTGCAGAACAAGAG<br>TCACGTGTCAAGGCTTCATC         | [e]       | 583 bp             |
| BQCV 3F<br>BQCV 4R                         | GCAAGCTCTTCCAATGATAG<br>AAGATTCAGCCGAGTCCTTA         | [d]       | 322 bp             |
| SB 1F<br>SB 2R                             | ACCAACCGATTCTCAGTAG<br>CCTTGGAAGCTCTGCTGTGTA         | [f]       | 487 bp             |
| <i>AmFV</i> rrSSU F<br><i>AmFV</i> rrSSU R | ACGAACGACTATCTAGCCATGAAC<br>GTCCGTTTCGGAGTGCATGAC    | [g]       | 591 bp             |
| <i>AmFV</i> TS F<br><i>AmFV</i> TS R       | CGCATGTACCAACAACCTCGTAC<br>CACAGTTGGTGTAGCGCAGT      | [g]       | 361 bp             |
| BSRV-4714 f<br>BSRV-37 r                   | RGTGCAGCTTTATGCGTTGCC<br>CCGCTGTTGAGAATAAGGATATCCAGG | [h]       | 519 bp             |
| LSVdeg f<br>LSVdeg r                       | GCCWCGRYTGTTGGTYCCCCC<br>GAGGTGGCGGCGCSAGATAAAGT     | [i]       | 578 bp             |
| VdMLV f<br>VdMLV r                         | ATCCCTTTTCAGTTCGCT<br>AGAAGAGACTTCAAGGAC             | [j]       | 438 bp             |
| IAPV IGR f<br>IAPV IGR r                   | CGATGAACAACGGAAGGTTT<br>ATCGGCTAAGGGGTTTGTIT         | [k]       | 766 bp             |
| KBV2 6639 f<br>KBV2 6801 r                 | CCATACCTGCTGATAACC<br>CTGAATAATACTGTGCGTATC          | [c]       | 200 bp             |
| CBPV 1-1<br>CBPV 1-2                       | TCAGACACCGAATCTGATTATTG<br>ACTACTAGAACTCGTCGCTTCG    | [l]       | 570 bp             |
| CBPV A7<br>CBPV A8                         | ACTCCCGTCGTTGTGTTCTC<br>GGCGATTGGTATTTGTTTGG         | [m]       | 895 bp             |

References:

[a] Berényi, O.; Bakonyi, T.; Derakhshifar, I.; Köglberger, H.; Topolska, G.; Ritter, W.; Pechhacker, H.; Nowotny, N. Phylogenetic analysis of Deformed wing virus genotypes from diverse geographic origins indicates recent global distribution of the virus. *Appl. Environ. Microbiol.* **2007**, *73*, 3605, DOI: 10.1128/AEM.00696-07.

- [b]** Bradford, E.; Christie, C.R.; Campbell, E.M.; Bowman, A.S. A real-time PCR method for quantification of the total and major variant strains of the deformed wing virus. *PLoS ONE* **2017**, *12*, DOI 10.1371/journal.pone.0190017.
- [c]** de Miranda, J.R.; Cordoni, G.; Budge, G. The Acute bee paralysis virus-Kashmir bee virus-Israeli acute paralysis virus complex. *J. Invertebr. Pathol.* **2010**, *103*, S30-S47, DOI 10.1016/j.jip.2009.06.014.
- [d]** Grabensteiner, E.; Bakonyi, T.; Ritter, W.; Pechhacker, H.; Nowotny, N. Development of a multiplex RT-PCR for the simultaneous detection of three viruses of the honeybee (*Apis mellifera* L.): *Acute bee paralysis virus*, *Black queen cell virus* and *Sacbrood virus*. *J. Invert. Pathol.* **2007**, *94*, 222-225, DOI: 10.1016/j.jip.2006.11.006.
- [e]** Tapasztai, Z.; Forgách, P.; Kővágyó, C.; Topolska, G.; Nowotny, N.; Rusvai, M.; Bakonyi, T. Genetic analysis and phylogenetic comparison of Black queen cell virus genotypes. *Vet. Microbiol.* **2009**, *139*, 227-234, DOI: 10.1016/j.vetmic.2009.06.002.
- [f]** Grabensteiner, E.; Ritter, W.; Carter, M. J.; Davison, S.; Pechhacker, H.; Kolodziejek, J.; Boecking, O.; Derakhshifar, I.; Moosbeckhofer, R.; Licek, E.; Nowotny, N. Sacbrood virus of the honeybee (*Apis mellifera*): Rapid identification and phylogenetic analysis using reverse transcription-PCR. *Clin. Diagn. Lab. Immunol.* **2001**, *8*, 93, DOI: 10.1128/CDLI.8.1.93-104.2001.
- [g]** Cornman, R.S.; Schatz, M.C.; Johnston, J.S.; Chen, Y.-P.; Pettis, J.; Hunt, G.; Bourgeois, L.; Elsik, C.; Anderson, D.; Grozinger, C.M.; Evans, J.D. Genomic survey of the ectoparasitic mite *Varroa destructor*, a major pest of the honey bee *Apis mellifera*. *BMC Genomics* **2010**, *11*, 602, DOI: 10.1186/1471-2164-11-602.
- [h]** Runckel, C.; Flenniken, M.L.; Engel, J.C.; Ruby, J.G.; Ganem, D.; Andino, R.; DeRisi, J.L. Temporal analysis of the honey bee microbiome reveals four novel viruses and seasonal prevalence of known viruses, *Nosema*, and *Crithidia*. *PLoS ONE* **2011**, *6*, e20656, DOI: 10.1371/journal.pone.0020656.
- [i]** Ravoet, J.; Maharramow, J.; Meeus, I.; De Smet, L.; Wenseleers, T.; Smagghe, G.; de Graaf, D.C. Comprehensive bee pathogen screening in Belgium reveals *Crithidia mellificae* as a new contributory factor to winter mortality. *PLoS ONE* **2013**, *8*, e72443, DOI: 10.1371/journal.pone.0072443.
- [j]** Gauthier, L.; Ravallec, M.; Tournaire, M.; Cousserans, F.; Bergoin, M.; Dainat, B.; de Miranda, J.R. Viruses associated with ovarian degeneration in *Apis mellifera* L. queens. *PLoS ONE* **2011**, *6*, e16217, DOI 10.1371/journal.pone.0016217.
- [k]** Palacios, G.; Hui, P.; Quan, P.L.; Kalkstein, A.; Honkavuori, K.S.; Bussetti, A.V.; Conlan, S.; Evans, J.; Chen, Y.P.; vanEngelsdorp, D.; Efrat, H.; Pettis, J.; Cox-foster, D.; Holmes, E.C.; Briese, T.; Lipkin, W.I. Genetic analysis of Israel acute paralysis virus: Distinct clusters are circulating in the United States. *J. Virol.* **2008**, *82*, 6209, DOI: 10.1128/JVI.00251-08.
- [l]** Blanchard, P.; Olivier, v.; Iscache, A.-L.; Celle, O.; Schurr, F.; Lallemand, C.; Ribière, M. Improvement of RT-PCR detection of chronic bee paralysis virus (CBPV) required by the description of genomic variability in French CBPV isolates. *J. Invert. Pathol.* **2008**, *97*, 182-185, DOI: 10.1016/j.jip.2007.07.003.
- [m]** Blanchard, P.; Schurr, F.; Olivier, V.; Celle, O.; Antúnez, K.; Bakonyi, T.; Berthoud, H.; Haubruge, E.; higes, M.; Kasprzak, S.; Koeglberger, H.; Kryger, P.; Thiéry, R.; Ribière, M. Phylogenetic analysis of the RNA-dependent RNA polymerase (RdRp) and a predicted structural protein (pSP) of the Chronic bee paralysis virus (CBPV) isolated from various geographic regions. *Vir. Res.* **2009**, *144*, 334-338, DOI: 10.1016/j.virusres.2009.04.025.
