# Supplementary material for: Multiple Virus Infections in Western Honeybee (Apis mellifera L.) Ejaculate Used for Instrumental Insemination
Source: MDPI journal article supplement (doi:10.3390/v11040306), 2019-03-29
Supplement: s1 [file s1]

Table S3: List and description of samples and detection of viral sequences in sperm used for insemination

| Sample No.          | Origin  | Condition of colony | The presence of viral sequences |       |       |      |       | Infection |
|---------------------|---------|---------------------|---------------------------------|-------|-------|------|-------|-----------|
|                     |         |                     | DWV                             | ABPV  | BQCV  | SBV  | AmFV  |           |
| 815/16              | Czechia | app. healthy        | -                               | -     | -     | -    | +     | single    |
| 816/16              | Germany | app. healthy        | -                               | -     | -     | -    | -     | free      |
| 817/16              | Germany | app. healthy        | +                               | -     | -     | -    | +     | multiple  |
| 818/16              | Czechia | app. healthy        | +                               | -     | -     | -    | -     | single    |
| 825/16              | Czechia | app. healthy        | +                               | -     | -     | -    | +     | multiple  |
| 826/16 <sup>1</sup> | Czechia | app. healthy        | +                               | -     | +     | -    | +     | multiple  |
| 827/16              | Germany | app. healthy        | +                               | -     | -     | -    | +     | multiple  |
| 828/16              | Germany | app. healthy        | +                               | -     | -     | -    | +     | multiple  |
| 829/16              | Germany | app. healthy        | -                               | -     | -     | -    | +     | single    |
| 830/16              | Czechia | app. healthy        | +                               | -     | -     | -    | +     | multiple  |
| 831/16              | Czechia | app. healthy        | +                               | -     | -     | -    | +     | multiple  |
| 832/16              | Czechia | app. healthy        | +                               | -     | +     | -    | +     | multiple  |
| 833/16              | Austria | app. healthy        | -                               | -     | -     | -    | -     | free      |
| 834/16              | Austria | app. healthy        | -                               | -     | -     | -    | -     | free      |
| 835/16              | Hungary | app. healthy        | +                               | +     | -     | -    | +     | multiple  |
| 836/16              | Hungary | app. healthy        | +                               | +     | -     | -    | +     | multiple  |
| 837/16              | Hungary | app. healthy        | +                               | +     | -     | -    | +     | multiple  |
| 838/16              | Czechia | app. healthy        | -                               | -     | -     | -    | +     | single    |
| 839/16              | Czechia | app. healthy        | +                               | -     | -     | -    | +     | multiple  |
| 35/17 <sup>2</sup>  | Czechia | app. healthy        | +                               | -     | +     | -    | +     | multiple  |
| 37/17               | Czechia | app. healthy        | -                               | -     | -     | -    | -     | free      |
| 38/17               | Czechia | app. healthy        | +                               | +     | -     | -    | +     | multiple  |
| 40/17               | Czechia | app. healthy        | +                               | -     | -     | -    | -     | single    |
| 41/17               | Czechia | app. healthy        | +                               | -     | -     | -    | +     | multiple  |
| 42/17               | Czechia | app. healthy        | +                               | -     | -     | -    | +     | multiple  |
| 43/17               | Czechia | app. healthy        | +                               | -     | -     | -    | +     | multiple  |
| 44/17               | Czechia | app. healthy        | +                               | -     | -     | -    | +     | multiple  |
| 45/17 <sup>3</sup>  | Czechia | app. healthy        | +                               | -     | +     | -    | +     | multiple  |
| 46/17               | Czechia | app. healthy        | +                               | -     | -     | -    | +     | multiple  |
| 47/17 <sup>4</sup>  | Czechia | app. healthy        | +                               | +     | +     | -    | +     | multiple  |
| 48/17               | Czechia | app. healthy        | +                               | -     | -     | -    | -     | single    |
| 49/17               | Czechia | app. healthy        | +                               | +     | -     | -    | +     | multiple  |
| 50/17               | Czechia | app. healthy        | +                               | +     | -     | -    | +     | multiple  |
| 51/17               | Czechia | app. healthy        | +                               | +     | -     | +    | +     | multiple  |
| 52/17               | Czechia | app. healthy        | +                               | -     | -     | -    | -     | single    |
| 53/17               | Czechia | app. healthy        | +                               | -     | -     | -    | -     | single    |
| 54/17               | Czechia | app. healthy        | +                               | -     | -     | -    | -     | single    |
| 55/17               | Czechia | app. healthy        | +                               | -     | -     | -    | -     | single    |
| 56/17               | Czechia | app. healthy        | +                               | -     | -     | -    | -     | single    |
| 57/17               | Czechia | app. healthy        | +                               | -     | +     | -    | +     | multiple  |
| 58/17               | Czechia | app. healthy        | +                               | -     | -     | -    | +     | multiple  |
| 59/17               | Czechia | app. healthy        | +                               | -     | -     | -    | -     | single    |
| 60/17               | Czechia | app. healthy        | +                               | -     | -     | -    | -     | single    |
| Total               |         |                     | 83.7%                           | 18.6% | 13.9% | 2.3% | 67.4% |           |

<sup>1</sup>strain Dol826; <sup>2</sup>strain Dol35; <sup>3</sup>strain Dol45; <sup>4</sup>strain Dol47
